# Supplementary material for: Characterizing the role of atrial natriuretic peptide signaling in the development of embryonic ventricular conduction system
Source: PubMed Central journal article supplement (PMC5932026; doi:10.1038/s41598-018-25292-0), 2018-05-02
Supplement: 41598_2018_25292_MOESM1_ESM.pdf [file 41598_2018_25292_MOESM1_ESM.pdf]

## **Supplementary information**

### **Characterizing the role of atrial natriuretic peptide signaling in the development of embryonic ventricular conduction system**

**Arun Govindapillai, Adam Hotchkiss, Mark Baguma-Nibasheka, Robert A. Rose, Lucile Miquerol, Oliver Smithies, Nobuyo Maeda and Kishore B.S. Pasumarthi**

**Supplementary Table S1: List of primers and corresponding primer sequences for real-time quantitative PCR (RT-qPCR) experiments and expected amplicon sizes:**

| <b>Name of the Primer</b> | <b>Primer Sequence (5' to 3')</b> | <b>Expected Amplicon Sizes (bp)</b> |
|---------------------------|-----------------------------------|-------------------------------------|
| Cx40-F                    | CAGAGCCTGAAGAAGCCAAC              | 137                                 |
| Cx40-R                    | GACTGTGGAGTGCTTGTGGA              |                                     |
| HCN4-F                    | CCTCCTGCGCCTCTTGAGGCTTT           | 119                                 |
| HCN4-R                    | TGCCAATGAGGTTACGATGCGT            |                                     |
| GAPDH-F                   | TCGTCCCGTAGACAAAATGG              | 132                                 |
| GAPDH-R                   | TTGAGGTCAATGAAGGGGTC              |                                     |

F: Forward or sense primer; R: Reverse or antisense primer

**Supplementary Table S2: List of primers utilized for genotyping and their expected amplicon sizes (bp):**

| <b>Name of the primer</b> | <b>Primer Sequence (5' to 3')</b> | <b>Wild type allele</b> | <b>Knock-in/knockout allele</b> |
|---------------------------|-----------------------------------|-------------------------|---------------------------------|
| <b>Nkx2.5-S</b>           | GCCCTGTCCCTCGGATTTACACC           | 264                     | 583                             |
| <b>Nkx2.5-AS</b>          | ACGCACTCACTTTAATGGGAAGAG          |                         |                                 |
| <b>Cre-S</b>              | GATGACTCTGGTCAGAGATACCTG          |                         |                                 |
| <b>Rosa 1</b>             | AAAGTCGCTCTGAGTTGTTAT             | 650                     | 320                             |
| <b>Rosa 2</b>             | GCGAAGAGTTTGTCTCAACC              |                         |                                 |
| <b>Rosa 3</b>             | GGAGCGGGAGAAATGGATATG             |                         |                                 |
| <b>Npr1-S</b>             | GCATGGTTCAGCTCTAAGA               | 339                     | 500                             |
| <b>Npr1-AS</b>            | CTAACCTGTGAACTGTAAGC              |                         |                                 |
| <b>Neo-AS</b>             | CCTTCAGTTATCTACATCTGC             |                         |                                 |
| <b>Cx40-S</b>             | CTCCAATTAACCTTGTGAGCC             | 380                     | 450                             |
| <b>Cx40-AS</b>            | AGGCTGAATGGTATCGCACC              |                         |                                 |
| <b>Neo-AS</b>             | CTTGCCGAATATCATGGTGG              |                         |                                 |

**Supplementary Table S3: List of primary antibodies and corresponding dilutions used for immunostaining experiments.**

| <b>Primary Antibody</b>                        | <b>Dilution</b> | <b>Source/Catalogue #</b>                                   |
|------------------------------------------------|-----------------|-------------------------------------------------------------|
| $\beta$ -galactosidase<br>(Rabbit polyclonal)  | 1:50            | Chappel ICN<br>Catalogue #: 55976                           |
| Connexin40 (Cx40)<br>(Rabbit polyclonal)       | 1:50            | Alpha Diagnostics<br>Catalogue #: Cx40-A                    |
| HCN4<br>(Rabbit polyclonal)                    | 1:50            | Alamone Laboratories<br>Catalogue #: APC-052                |
| Sarcomeric myosin (MF20)<br>(Mouse monoclonal) | 1:50            | Developmental Studies Hybridoma<br>Bank, Catalogue #: MF-20 |
